# Supplementary material for: Expression Pattern and Molecular Mechanism of Oxidative Stress-Related Genes in Myocardial Ischemia–Reperfusion Injury
Source: J Cardiovasc Dev Dis. 2023 Feb 13;10(2):79. doi: 10.3390/jcdd10020079 (PMC9961140; doi:10.3390/jcdd10020079)
Supplement: Supplementary file 1 [file jcdd-10-00079-s001.zip]

Archive with 4 entries (4 files):
- Supplementary File S1. Oxidative stress-related genes in MSigDB.xlsx
- Supplementary File S2. The primer sequence information of qPCR experiment.xlsx
- Supplementary File S3. Differentially expressed genes in GSE160516 and GSE61592.xlsx
- Supplementary File S4. Results of three algorithms (EPC, Degree, and Betweenness) predicting hub genes.pdf
