# Supplementary material for: Expression Pattern and Molecular Mechanism of Oxidative Stress-Related Genes in Myocardial Ischemia–Reperfusion Injury
Source: J Cardiovasc Dev Dis. 2023 Feb 13;10(2):79. doi: 10.3390/jcdd10020079 (PMC9961140; doi:10.3390/jcdd10020079)
Supplement: Supplementary file 1 [file jcdd-10-00079-s001.zip › Supplementary File S1. Oxidative stress-related genes in MSigDB.xlsx]

## Sheet: Oxidative Stress related Genes
MSigDB															Oxidative Stress related Genes
GOBP_CELL_DEATH_IN_RESPONSE_TO_OXIDATIVE_STRESS	GOBP_CELLULAR_RESPONSE_TO_OXIDATIVE_STRESS	GOBP_INTRINSIC_APOPTOTIC_SIGNALING_PATHWAY_IN_RESPONSE_TO_OXIDATIVE_STRESS	GOBP_NEGATIVE_REGULATION_OF_CELLULAR_RESPONSE_TO_OXIDATIVE_STRESS	GOBP_NEGATIVE_REGULATION_OF_OXIDATIVE_STRESS_INDUCED_CELL_DEATH	GOBP_NEGATIVE_REGULATION_OF_OXIDATIVE_STRESS_INDUCED_INTRINSIC_APOPTOTIC_SIGNALING_PATHWAY	GOBP_NEGATIVE_REGULATION_OF_RESPONSE_TO_OXIDATIVE_STRESS	GOBP_POSITIVE_REGULATION_OF_OXIDATIVE_STRESS_INDUCED_CELL_DEATH	GOBP_POSITIVE_REGULATION_OF_OXIDATIVE_STRESS_INDUCED_INTRINSIC_APOPTOTIC_SIGNALING_PATHWAY	GOBP_POSITIVE_REGULATION_OF_RESPONSE_TO_OXIDATIVE_STRESS	GOBP_REGULATION_OF_OXIDATIVE_STRESS_INDUCED_CELL_DEATH	GOBP_REGULATION_OF_OXIDATIVE_STRESS_INDUCED_INTRINSIC_APOPTOTIC_SIGNALING_PATHWAY	GOBP_REGULATION_OF_RESPONSE_TO_OXIDATIVE_STRESS	GOBP_RESPONSE_TO_OXIDATIVE_STRESS		ABCB11
ABL1	ABCC1	AKT1	H19	AKT1	AKT1	DDR2	ABL1	FBXW7	ABL1	ABL1	AKT1	ABCD1	ABCB11		ABCC1
AKT1	ABCD1	ARL6IP5	MIR132	ATF4	BAG5	GGT7	ENDOG	MCL1	ACOX2	AKT1	BAG5	ABL1	ABCC1		ABCD1
ARL6IP5	ABL1	BAG5	MIR21	BAG5	GPX1	GPR37	FBXW7	NOX1	ENDOG	ATF4	FBXW7	ACOX2	ABCD1		ABL1
ATF4	ADNP2	BCL2	MIR675	CTNNB1	HIF1A	GPR37L1	FOXO3	PARK7	FOXO3	BAG5	GPX1	AIFM2	ABL1		ACOX2
BAG5	ADPRS	CYP1B1	NCOA7	DDR2	HSPB1	H19	FOXP1	SFPQ	FOXP1	CTNNB1	HIF1A	AKT1	ACOX2		ADAM9
BCL2	AGAP3	DIABLO	OXR1	FBXO7	HTRA2	HGF	HDAC6	SOD1	HDAC6	DDR2	HSPB1	ALOX5	ADAM9		ADIPOQ
CTNNB1	AIF1	FBXW7		FYN	INS	IL10	MCL1	VNN1	MIR17	ENDOG	HTRA2	ATF4	ADIPOQ		ADNP2
CYP1B1	AIFM1	GPX1		FZD1	MAPK7	LRRK2	MIR17		MIR34A	FBXO7	INS	BAG5	ADNP2		ADPRS
DDR2	AIFM2	GSKIP		GATA4	NFE2L2	MCTP1	MIR34A		PAWR	FBXW7	MAPK7	BMP7	ADPRS		AGAP3
DIABLO	AKR1C3	HIF1A		GFER	NME5	MET	MMP3		RIPK1	FOXO3	MCL1	CD36	AGAP3		AIF1
ENDOG	AKT1	HSPB1		GPR37	NOL3	MIR132	NOX1		SELENON	FOXP1	NFE2L2	CTNNB1	AIF1		AIFM1
FBXO7	ALDH3B1	HTRA2		GPR37L1	NONO	MIR133A1	PARK7			FYN	NME5	DDR2	AIFM1		AIFM2
FBXW7	ALOX5	INS		GPX1	PARK7	MIR17	PAWR			FZD1	NOL3	DHFR	AIFM2		AKR1C3
FOXO3	ANKRD2	JAK2		HGF	PINK1	MIR21	REST			GATA4	NONO	DHFRP1	AKR1C3		AKT1
FOXP1	ANKZF1	MAP3K5		HIF1A	PPIA	MIR675	RIPK1			GFER	NOX1	ENDOG	AKT1		ALAD
FYN	ANXA1	MAPK7		HSPB1	PRKN	MIR92A1	SFPQ			GPR37	P4HB	FBLN5	ALAD		ALDH3B1
FZD1	APEX1	MCL1		HTRA2	SIRT1	MIRLET7B	SOD1			GPR37L1	PARK7	FBXO7	ALDH3B1		ALOX5
GATA4	APOA4	MELK		IL10	SOD2	NCOA7	TLR4			GPX1	PARP1	FBXW7	ALOX5		ALS2
GBA	AQP1	NFE2L2		INS	TRAP1	NFE2L2	TLR6			HDAC6	PINK1	FOXO3	ALS2		ANGPTL7
GFER	ARG1	NME5		LRRK2		NR4A3	TNF			HGF	PPIA	FOXP1	ANGPTL7		ANKRD2
GPR37	ARL6IP5	NOL3		MAPK7		OXR1	TRPM2			HIF1A	PRKN	FUT8	ANKRD2		ANKZF1
GPR37L1	ARNT	NONO		MEAK7		PARK7	VNN1			HSPB1	SFPQ	FYN	ANKZF1		ANXA1
GPX1	ARNTL	NOX1		MET		PDE8A				HTRA2	SIRT1	FZD1	ANXA1		APEX1
GSKIP	ATF2	P4HB		MIR133A1		PINK1				IL10	SOD1	GATA4	APEX1		APOA4
HDAC6	ATF4	PARK7		MIR17		PYCR1				INS	SOD2	GCH1	APOA4		APOD
HGF	ATP13A2	PARP1		MIR195		RACK1				LANCL1	TRAP1	GFER	APOD		APOE
HIF1A	ATP2A2	PDCD10		MIR19A		TRAP1				LRRK2	TREM2	GGT7	APOE		APP
HSPB1	ATP7A	PDK1		MIR21		TXN				MAPK7	UBQLN1	GPR37	APP		APTX
HTRA2	AXL	PINK1		MIR29B1						MCL1	VNN1	GPR37L1	APTX		AQP1
IL10	BAG5	PML		MIR92A1						MEAK7		GPX1	AQP1		AREG
INS	BCL2	PPIA		MIRLET7B						MET		H19	AREG		ARG1
JAK2	BECN1	PRKCD		NCOA7						MIR133A1		HDAC6	ARG1		ARL6IP5
LANCL1	BMP7	PRKN		NFE2L2						MIR17		HEBP2	ARL6IP5		ARNT
LRRK2	BNIP3	PRODH		NME5						MIR195		HGF	ARNT		ARNTL
MAP3K5	BRF2	SFPQ		NOL3						MIR19A		HIF1A	ARNTL		ATF2
MAPK7	BTK	SIRT1		NONO						MIR21		HSPB1	ATF2		ATF4
MCL1	CAMKK2	SOD1		NR4A3						MIR29B1		HTRA2	ATF4		ATOX1
MEAK7	CAT	SOD2		OXR1						MIR34A		IL10	ATOX1		ATP13A2
MELK	CCS	STK24		PAGE4						MIR92A1		INS	ATP13A2		ATP2A2
MET	CD36	STK25		PARK7						MIRLET7B		LANCL1	ATP2A2		ATP7A
MIR133A1	CDK1	TRAP1		PDE8A						MMP3		LRRK2	ATP7A		ATRN
MIR17	CHCHD2	TREM2		PINK1						NCOA7		MACROH2A1	ATRN		AXL
MIR195	CHD6	UBQLN1		PPIA						NFE2L2		MAPK7	AXL		BAD
MIR19A	CHUK	VNN1		PRKN						NME5		MAPKAP1	BAD		BAG5
MIR21	CPEB2	ZNF622		PYCR1						NOL3		MCL1	BAG5		BAK1
MIR29B1	CRYGD			RACK1						NONO		MCTP1	BAK1		BANF1
MIR34A	CTNNB1			REST						NOX1		MEAK7	BANF1		BCL2
MIR92A1	CYP1B1			SIRT1						NR4A3		MET	BCL2		BECN1
MIRLET7B	DAPK1			SLC7A11						OXR1		MIR132	BECN1		BMP7
MMP3	DDR2			SOD2						P4HB		MIR133A1	BMP7		BNIP3
NCOA7	DHFR			TBC1D24						PAGE4		MIR17	BNIP3		BRF2
NFE2L2	DHFRP1			TRAP1						PARK7		MIR195	BRF2		BTK
NME5	DHRS2			TSC1						PARP1		MIR19A	BTK		C19orf12
NOL3	DIABLO			TXN						PAWR		MIR21	C19orf12		CA3
NONO	ECT2			WNT1						PDE8A		MIR29B1	CA3		CAMKK2
NOX1	EDN1									PINK1		MIR34A	CAMKK2		CAPN2
NR4A3	EDNRA									PPIA		MIR675	CAPN2		CASP3
OXR1	EGFR									PRKN		MIR92A1	CASP3		CAT
P4HB	EIF2S1									PYCR1		MIRLET7B	CAT		CCS
PAGE4	ENDOG									RACK1		MMP3	CCS		CD36
PARK7	EPAS1									REST		NCOA7	CD36		CD38
PARP1	ERCC6L2									RIPK1		NFE2L2	CD38		CDK1
PAWR	ERMP1									SFPQ		NME5	CDK1		CHCHD2
PDCD10	ERN1									SIRT1		NOL3	CHCHD2		CHD6
PDE8A	ETV5									SLC7A11		NONO	CHD6		CHRNA4
PDK1	EZH2									SOD1		NOX1	CHRNA4		CHUK
PINK1	FABP1									SOD2		NR4A3	CHUK		COA8
PJVK	FANCC									STK26		OXR1	COA8		COL1A1
PML	FANCD2									TBC1D24		P4HB	COL1A1		CPEB2
PPIA	FBLN5									TLR4		PAGE4	CPEB2		CRK
PRKCD	FBXO7									TLR6		PARK7	CRK		CRYAB
PRKN	FBXW7									TNF		PARP1	CRYAB		CRYGD
PRODH	FER									TRAP1		PAWR	CRYGD		CTNNB1
PYCR1	FOS									TREM2		PDE8A	CTNNB1		CYB5B
RACK1	FOXO1									TRPM2		PINK1	CYB5B		CYGB
REST	FOXO3									TSC1		PNPLA8	CYGB		CYP1B1
RIPK1	FOXP1									TXN		PPIA	CYP1B1		CYP2E1
RNF112	FUT8									UBQLN1		PRKN	CYP2E1		DAPK1
SFPQ	FXN									VNN1		PYCR1	DAPK1		DDR2
SIGMAR1	FYN									WNT1		RACK1	DDR2		DGKK
SIRT1	FZD1											REST	DGKK		DHCR24
SLC1A1	G6PD											RIPK1	DHCR24		DHFR
SLC7A11	GAS5											SELENON	DHFR		DHFRP1
SOD1	GATA4											SESN1	DHFRP1		DHRS2
SOD2	GBA											SESN2	DHRS2		DIABLO
STK24	GCH1											SESN3	DIABLO		DUOX1
STK25	GFER											SFPQ	DUOX1		DUOX2
STK26	GJB2											SIRT1	DUOX2		ECT2
TBC1D24	GLRX2											SLC7A11	ECT2		EDN1
TLR4	GPR37											SOD1	EDN1		EDNRA
TLR6	GPR37L1											SOD2	EDNRA		EGFR
TNF	GPX1											STK26	EGFR		EIF2S1
TRAP1	GPX5											STOX1	EIF2S1		ENDOG
TREM2	GPX7											TBC1D24	ENDOG		EPAS1
TRPM2	GPX8											TLR4	EPAS1		EPX
TSC1	GSKIP											TLR6	EPX		ERCC1
TXN	GSR											TNF	ERCC1		ERCC2
UBQLN1	H19											TRAP1	ERCC2		ERCC3
VNN1	HDAC2											TREM2	ERCC3		ERCC6
WNT1	HDAC6											TRPM2	ERCC6		ERCC6L2
ZNF622	HGF											TSC1	ERCC6L2		ERCC8
	HIF1A											TXN	ERCC8		ERMP1
	HMOX1											UBQLN1	ERMP1		ERN1
	HSF1											VNN1	ERN1		ERO1A
	HSPA1A											WNT1	ERO1A		ETFDH
	HSPA1B												ETFDH		ETV5
	HSPB1												ETV5		EZH2
	HTRA2												EZH2		FABP1
	IL10												FABP1		FANCC
	IL18BP												FANCC		FANCD2
	IL6												FANCD2		FBLN5
	IMPACT												FBLN5		FBXO7
	INS												FBXO7		FBXW7
	JAK2												FBXW7		FER
	JUN												FER		FKBP1B
	KDM6B												FKBP1B		FOS
	KEAP1												FOS		FOSL1
	KLF2												FOSL1		FOXO1
	LANCL1												FOXO1		FOXO3
	LONP1												FOXO3		FOXP1
	LRRK2												FOXP1		FUT8
	MAP1LC3A												FUT8		FXN
	MAP3K5												FXN		FYN
	MAPK1												FYN		FZD1
	MAPK13												FZD1		G6PD
	MAPK3												G6PD		GAS5
	MAPK7												GAS5		GATA4
	MAPK8												GATA4		GBA
	MAPK9												GBA		GCH1
	MAPKAP1												GCH1		GCLC
	MAPT												GCLC		GCLM
	MCL1												GCLM		GFER
	MEAK7												GFER		GGT7
	MELK												GGT7		GJB2
	MET												GJB2		GLRX2
	MGAT3												GLRX2		GPR37
	MGMT												GPR37		GPR37L1
	MGST1												GPR37L1		GPX1
	MIR103A1												GPX1		GPX2
	MIR107												GPX2		GPX3
	MIR132												GPX3		GPX4
	MIR133A1												GPX4		GPX5
	MIR17												GPX5		GPX6
	MIR195												GPX6		GPX7
	MIR19A												GPX7		GPX8
	MIR21												GPX8		GSKIP
	MIR29B1												GSKIP		GSR
	MIR34A												GSR		GSS
	MIR675												GSS		GSTP1
	MIR92A1												GSTP1		H19
	MIRLET7B												H19		HAO1
	MMP2												HAO1		HBA1
	MMP3												HBA1		HBA2
	MMP9												HBA2		HBB
	MPO												HBB		HDAC2
	MPV17												HDAC2		HDAC6
	MSRA												HDAC6		HEBP2
	MT3												HEBP2		HGF
	NCF1												HGF		HIF1A
	NCOA7												HIF1A		HMOX1
	NET1												HMOX1		HMOX2
	NFE2L1												HMOX2		HNRNPM
	NFE2L2												HNRNPM		HP
	NME5												HP		HSF1
	NME8												HSF1		HSPA1A
	NOL3												HSPA1A		HSPA1B
	NONO												HSPA1B		HSPB1
	NOS3												HSPB1		HTRA2
	NOX1												HTRA2		HYAL1
	NQO1												HYAL1		HYAL2
	NR4A2												HYAL2		IDH1
	NR4A3												IDH1		IL10
	NUDT2												IL10		IL18BP
	OSER1												IL18BP		IL1A
	OXR1												IL1A		IL6
	P4HB												IL6		IMPACT
	PAGE4												IMPACT		INS
	PARK7												INS		IPCEF1
	PARP1												IPCEF1		JAK2
	PAWR												JAK2		JUN
	PAX2												JUN		KCNA5
	PCGF2												KCNA5		KDM6B
	PCNA												KDM6B		KEAP1
	PDCD10												KEAP1		KLF2
	PDE8A												KLF2		KRT1
	PDGFD												KRT1		LANCL1
	PDGFRA												LANCL1		LIAS
	PDK1												LIAS		LONP1
	PDK2												LONP1		LPO
	PENK												LPO		LRRK2
	PINK1												LRRK2		MACROH2A1
	PJVK												MACROH2A1		MAP1LC3A
	PKD2												MAP1LC3A		MAP3K5
	PLA2R1												MAP3K5		MAPK1
	PLEKHA1												MAPK1		MAPK13
	PML												MAPK13		MAPK3
	PNPLA8												MAPK3		MAPK7
	PNPT1												MAPK7		MAPK8
	PPARGC1A												MAPK8		MAPK9
	PPARGC1B												MAPK9		MAPKAP1
	PPIA												MAPKAP1		MAPT
	PPIF												MAPT		MBL2
	PRDX1												MBL2		MCL1
	PRDX2												MCL1		MCTP1
	PRDX3												MCTP1		MEAK7
	PRDX5												MEAK7		MELK
	PRKAA1												MELK		MET
	PRKAA2												MET		MGAT3
	PRKCD												MGAT3		MGMT
	PRKD1												MGMT		MGST1
	PRKN												MGST1		MICB
	PRKRA												MICB		MMP14
	PRODH												MMP14		MMP2
	PRR5L												MMP2		MMP3
	PTPRK												MMP3		MMP9
	PXN												MMP9		MPO
	PYCR1												MPO		MPV17
	PYCR2												MPV17		MSRA
	PYROXD1												MSRA		MSRB2
	RACK1												MSRB2		MSRB3
	RAD52												MSRB3		MT3
	RBM11												MT-CO1		MT-CO1
	RELA												MT-ND3		MTF1
	REST												MT-ND5		MT-ND3
	RHOB												MT-ND6		MT-ND5
	RIPK1												MT3		MT-ND6
	RIPK3												MTF1		MYEF2
	RNF112												MYEF2		NAPRT
	ROMO1												NAPRT		NCF1
	RPS3												NCF1		NCOA7
	RWDD1												NCOA7		NDUFA12
	SELENON												NDUFA12		NDUFA6
	SELENOS												NDUFA6		NDUFB4
	SESN2												NDUFB4		NDUFS2
	SETX												NDUFS2		NDUFS8
	SFPQ												NDUFS8		NEIL1
	SIGMAR1												NEIL1		NET1
	SIN3A												NET1		NFE2L1
	SIRPA												NFE2L1		NFE2L2
	SIRT1												NFE2L2		NME5
	SIRT2												NME5		NME8
	SLC1A1												NME8		NOL3
	SLC25A24												NOL3		NONO
	SLC4A11												NONO		NOS3
	SLC7A11												NOS3		NOX1
	SMPD3												NOX1		NQO1
	SNCA												NQO1		NR4A2
	SOD1												NR4A2		NR4A3
	SOD2												NR4A3		NUDT1
	SOD3												NUDT1		NUDT15
	SPHK1												NUDT15		NUDT2
	SRC												NUDT2		OGG1
	SRXN1												OGG1		OSER1
	STAT6												OSER1		OXR1
	STAU1												OXR1		OXSR1
	STAU2												OXSR1		P4HB
	STK24												P4HB		PAGE4
	STK25												PAGE4		PARK7
	STK26												PARK7		PARP1
	STX2												PARP1		PAWR
	STX4												PAWR		PAX2
	SUMO4												PAX2		PCGF2
	TBC1D24												PCGF2		PCNA
	TLR4												PCNA		PDCD10
	TLR6												PDCD10		PDE8A
	TMEM161A												PDE8A		PDGFD
	TNF												PDGFD		PDGFRA
	TNFAIP3												PDGFRA		PDGFRB
	TP53												PDGFRB		PDK1
	TP53INP1												PDK1		PDK2
	TPM1												PDK2		PDLIM1
	TRAP1												PDLIM1		PENK
	TREM2												PENK		PINK1
	TREX1												PINK1		PJVK
	TRPA1												PJVK		PKD2
	TRPM2												PKD2		PLA2R1
	TSC1												PLA2R1		PLEKHA1
	TXN												PLEKHA1		PLK3
	UBQLN1												PLK3		PML
	UCP1												PML		PNKP
	VKORC1L1												PNKP		PNPLA8
	VNN1												PNPLA8		PNPT1
	VRK2												PNPT1		PON2
	WNT1												PON2		PPARGC1A
	WNT16												PPARGC1A		PPARGC1B
	ZC3H12A												PPARGC1B		PPIA
	ZFAND1												PPIA		PPIF
	ZNF277												PPIF		PPP1R15B
	ZNF580												PPP1R15B		PPP2CB
	ZNF622												PPP2CB		PRDX1
													PRDX1		PRDX2
													PRDX2		PRDX3
													PRDX3		PRDX4
													PRDX4		PRDX5
													PRDX5		PRDX6
													PRDX6		PRKAA1
													PRKAA1		PRKAA2
													PRKAA2		PRKCD
													PRKCD		PRKD1
													PRKD1		PRKN
													PRKN		PRKRA
													PRKRA		PRNP
													PRNP		PRODH
													PRODH		PRR5L
													PRR5L		PSEN1
													PSEN1		PSIP1
													PSIP1		PSMB5
													PSMB5		PTGS1
													PTGS1		PTGS2
													PTGS2		PTK2B
													PTK2B		PTPRK
													PTPRK		PTPRN
													PTPRN		PXDN
													PXDN		PXDNL
													PXDNL		PXN
													PXN		PYCR1
													PYCR1		PYCR2
													PYCR2		PYROXD1
													PYROXD1		RACK1
													RACK1		RAD52
													RAD52		RBM11
													RBM11		RBPMS
													RBPMS		RCAN1
													RCAN1		RELA
													RELA		REST
													REST		RGS14
													RGS14		RHOB
													RHOB		RIPK1
													RIPK1		RIPK3
													RIPK3		RNF112
													RNF112		ROMO1
													ROMO1		RPS3
													RPS3		RRM2B
													RRM2B		RWDD1
													RWDD1		S100A7
													S100A7		SCARA3
													SCARA3		SCGB1A1
													SCGB1A1		SDC1
													SDC1		SELENOK
													SELENOK		SELENON
													SELENON		SELENOP
													SELENOP		SELENOS
													SELENOS		SESN1
													SESN1		SESN2
													SESN2		SESN3
													SESN3		SETX
													SETX		SFPQ
													SFPQ		SGK2
													SGK2		SIGMAR1
													SIGMAR1		SIN3A
													SIN3A		SIRPA
													SIRPA		SIRT1
													SIRT1		SIRT2
													SIRT2		SLC1A1
													SLC1A1		SLC23A2
													SLC23A2		SLC25A24
													SLC25A24		SLC4A11
													SLC4A11		SLC7A11
													SLC7A11		SLC8A1
													SLC8A1		SMPD3
													SMPD3		SNCA
													SNCA		SOD1
													SOD1		SOD2
													SOD2		SOD3
													SOD3		SP1
													SP1		SPHK1
													SPHK1		SRC
													SRC		SRXN1
													SRXN1		STAT1
													STAT1		STAT6
													STAT6		STAU1
													STAU1		STAU2
													STAU2		STC2
													STC2		STK24
													STK24		STK25
													STK25		STK26
													STK26		STOX1
													STOX1		STX2
													STX2		STX4
													STX4		SUMO4
													SUMO4		TACR1
													TACR1		TAT
													TAT		TBC1D24
													TBC1D24		THG1L
													THG1L		TLDC2
													TLDC2		TLR4
													TLR4		TLR6
													TLR6		TMEM161A
													TMEM161A		TNF
													TNF		TNFAIP3
													TNFAIP3		TOR1A
													TOR1A		TP53
													TP53		TP53INP1
													TP53INP1		TPM1
													TPM1		TPO
													TPO		TRAP1
													TRAP1		TREM2
													TREM2		TREX1
													TREX1		TRPA1
													TRPA1		TRPM2
													TRPM2		TSC1
													TSC1		TXN
													TXN		TXN2
													TXN2		TXNIP
													TXNIP		TXNRD2
													TXNRD2		UBE3A
													UBE3A		UBQLN1
													UBQLN1		UCN
													UCN		UCP1
													UCP1		UCP2
													UCP2		UCP3
													UCP3		VKORC1L1
													VKORC1L1		VNN1
													VNN1		VRK2
													VRK2		WNT1
													WNT1		WNT16
													WNT16		WRN
													WRN		XRCC1
													XRCC1		ZC3H12A
													ZC3H12A		ZFAND1
													ZFAND1		ZNF277
													ZNF277		ZNF580
													ZNF580		ZNF622
													ZNF622
