# Supplementary material for: Expression Pattern and Molecular Mechanism of Oxidative Stress-Related Genes in Myocardial Ischemia–Reperfusion Injury
Source: J Cardiovasc Dev Dis. 2023 Feb 13;10(2):79. doi: 10.3390/jcdd10020079 (PMC9961140; doi:10.3390/jcdd10020079)
Supplement: Supplementary file 1 [file jcdd-10-00079-s001.zip › Supplementary File S2. The primer sequence information of qPCR experiment.xlsx]

## Sheet: The primer sequence information
mRNA	Forward(5'to3')	Sequence length	Reverse(5'to3')	Sequence length	Product sequence length	GeneID
β-actin	TGACAGGATGCAGAAGGAGA	20	TAGAGCCACCAATCCACACA	20	249	81822
Aif1	AGCGAATGCTGGAGAAAC	18	CTCGGAGCCACTGGACAC	18	83	29427
Apoe	GAGCAGACCCAGCAGATA	18	GCAATGGAGTTGGTAGCC	18	146	25728
Arg1	ACGGTCTGTGGGAAAAGC	18	GACGCATAGGTCAGGGTG	18	151	29221
Cdk1	GACAAAGGAACAATCAAACT	20	TACCACAGCGTCACTACC	18	95	54237
Col1a1	CTACAGCACGCTTGTGGA	18	GGAGGTCTTGGTGGTTTT	18	85	29393
Gpx1	ACATCAGGAGAATGGCAAGA	20	TCCGCAGGAAGGTAAAGA	18	146	24404
Gpx7	ACGCAATCCGAGCAAGAC	18	TTCACCACCAGGGAAACC	18	101	298376
Hmox1	AGCGAAACAAGCAGAACC	18	CAGCAGCTCAGGATGAGTAC	20	191	24451
Hp	GCGGAATGTCAACTTTAG	18	TGTGCTTTTCTCATAGTGC	19	97	24464
Mmp14	TTCCGAGAAGTGCCCTAT	18	TGGAAACCCTCAGCAAAC	18	83	81707
Sirpa	TGTTCTGCCTGCTGCTCT	18	TTTTGCCCTTCTCCTTTG	18	181	25528
Trem2	ACACCCTTGCTGGAACTG	18	TCGGAGGCTCTGACACTG	18	83	301227
