# Supplementary material for: Expression Pattern and Molecular Mechanism of Oxidative Stress-Related Genes in Myocardial Ischemia–Reperfusion Injury
Source: J Cardiovasc Dev Dis. 2023 Feb 13;10(2):79. doi: 10.3390/jcdd10020079 (PMC9961140; doi:10.3390/jcdd10020079)
Supplement: Supplementary file 1 [file jcdd-10-00079-s001.zip › Supplementary File S3. Differentially expressed genes in GSE160516 and GSE61592.xlsx]

## Sheet: Differentially expressed gene
GSE160516						GSE61592
Gene	logFC	adj.P Value				Gene	logFC	adj.P Value
Spp1	9.51613	7.24e-06				Spp1	6.18523	1.62e-12
Timp1	8.18258	4.087e-05				Lgals3	5.75816	1.62e-12
Tnc	7.8636	4.69e-06				Timp1	5.68333	3.66e-12
Gpnmb	7.53372	4.69e-06				Gpnmb	5.63823	1.85e-11
Mpeg1	6.39082	4.69e-06				Ces1d	-4.8819	9.68e-12
Lox	6.0706	4.69e-06				Hrc	-4.64067	3.37e-11
Fn1	5.92848	4.69e-06				S100a8	4.51336	6.22e-10
Hmox1	5.82971	0.00079841				Ccl7	4.37306	6.73e-12
Col1a1	5.77556	4.69e-06				Lox	4.30148	2.66e-11
Postn	5.73323	9.08e-06				Ms4a6d	4.2891	2.77e-12
Cthrc1	5.67788	4.69e-06				Tcap	-4.2325	1.15e-11
Lgals3	5.62761	5.387e-05				Myh6	-4.19049	3.11e-10
Serpina3n	5.54135	0.00044945				Rpl3l	-4.1677	2.77e-12
Col3a1	5.5386	4.69e-06				Sprr1a	4.12386	9.68e-12
Col1a2	5.45751	4.69e-06				Clec4d	4.00425	5.53e-12
Ms4a7	5.3758	1.617e-05				Lrtm1	-3.9971	1.08e-11
Ctss	5.36716	4.69e-06				Arg1	3.94442	3.29e-10
Trem2	5.35796	1.768e-05				Hopx	-3.91256	5.48e-12
Ccr2	5.23278	4.69e-06				Tnc	3.85986	4.57e-12
Cd180	5.11342	4.087e-05				Ckm	-3.80157	9.68e-12
Fcer1g	5.09524	4.69e-06				Mpeg1	3.744	1.13e-10
C3ar1	4.86712	4.69e-06				Chil3	3.73738	1.72e-11
Hist1h2ak	4.84121	0.00034632				Yipf7	-3.73019	5.74e-12
Slamf7	4.79956	1.847e-05				Bcl2a1d	3.67727	2.3e-11
Wfdc17	4.7492	4.69e-06				Ccl12	3.63801	1.76e-11
Clec12a	4.69786	3.298e-05				AA467197	3.63404	2.66e-11
Lilr4b	4.69166	5.01e-06				Hist1h2ah	3.61115	6.41e-11
Thbs1	4.66481	7.164e-05				Cmya5	-3.56307	1.15e-11
Glipr1	4.66042	6.84e-06				Fndc5	-3.53227	1.41e-11
Mki67	4.65703	0.0007169				Fcer1g	3.52856	2.08e-11
Tlr13	4.64601	3.47e-05				Hist1h2ad	3.52774	2.09e-09
Ly86	4.62855	4.69e-06				Bcl2a1b	3.49114	9.68e-12
Mmp12	4.61775	0.00200898				Hist1h2af	3.4869	1.65e-10
Sprr1a	4.57785	9.064e-05				Ccl4	3.48473	1.67e-10
Apoc2	4.52257	0.00023577				Cotl1	3.48354	1.21e-11
Itgam	4.51291	2.427e-05				Hist1h2an	3.47392	5.08e-10
Ccl12	4.46173	0.00432707				Fn1	3.46852	2.88e-11
Lilrb4a	4.42315	6.61e-06				Hist1h2ak	3.46063	1.85e-09
Ptn	4.41416	0.00017896				Wfdc17	3.45165	1.41e-10
Ifi30	4.30269	2.427e-05				Ms4a7	3.451	9.83e-10
Sfrp2	4.26706	4.89e-05				S100a9	3.42833	1.36e-08
Cd52	4.26269	3.47e-05				Trem2	3.41558	9.68e-12
Fcrls	4.21894	6.61e-06				Hist1h2ap	3.40063	7.78e-10
Lyz2	4.19848	4.69e-06				Hist1h2ai	3.3503	8.29e-10
Emb	4.1938	4.69e-06				Dgat2	-3.32081	3.12e-10
Mmp14	4.15392	4.746e-05				Mlf1	-3.31309	9.68e-12
Adam8	4.14466	0.00035801				Hmox1	3.3022	1.62e-08
Plk1	4.12285	4.89e-05				Perm1	-3.29911	5.53e-11
Cd84	4.10107	6.61e-06				Ccl9	3.28815	7.7e-11
Mfap4	4.08618	0.00038271				Plac8	3.28518	4.18e-11
Soat1	4.06188	2.87e-05				Col3a1	3.28156	2.66e-11
Loxl3	4.04056	0.00015969				Chil4	3.25874	2.1e-11
Fcgr1	4.00101	3.276e-05				Serpina3n	3.25693	6.1e-11
Aif1	3.98188	0.00068501				Mmp14	3.23022	1.77e-09
Ms4a6d	3.95063	3.126e-05				Lat2	3.21335	1.01e-11
Cd53	3.94054	1.494e-05				Car14	-3.19521	9.68e-12
Ccnb2	3.90347	0.00021208				Slc11a1	3.19453	1.39e-11
Sfrp1	3.90245	0.00013641				Cd52	3.19376	2.3e-11
Apobec1	3.88454	2.149e-05				Acsl1	-3.18414	2.23e-11
Tlr7	3.85993	3.106e-05				Ccl8	3.16675	2.36e-10
Ube2c	3.85093	5.492e-05				Alox5ap	3.15448	1.39e-11
Clec4a3	3.8109	2.051e-05				9930105H17Rik	-3.1534	4.3e-10
Ms4a4c	3.8028	0.00011682				Dhrs7c	-3.15214	8.94e-11
Ncf1	3.76543	4.69e-06				Col1a2	3.15143	3.64e-11
Mir692-3	3.7586	7.128e-05				Cstb	3.14521	9.68e-12
Adam12	3.73152	2.427e-05				Plin5	-3.14096	3.64e-11
Csf3r	3.72386	0.00011407				Pfkm	-3.13293	9.68e-12
Tyrobp	3.71919	6.062e-05				Lrrc14b	-3.12451	1.26e-10
Cenpe	3.7141	0.00048729				Lyz2	3.11884	1.02e-10
Clec4d	3.70483	0.00038284				Rab32	3.04876	1.74e-11
Dpep2	3.70075	6.276e-05				Art1	-3.0374	1.76e-11
Cd72	3.69924	0.00011835				Tyrobp	3.0221	4.88e-11
Atp6v0d2	3.68911	0.00011722				Prc1	3.0074	9.16e-10
Lrrc17	3.64106	0.0001156				Col1a1	3.00617	4.82e-11
Selplg	3.62681	1.041e-05				Tgfbi	3.00578	4.18e-11
Fcgr2b	3.62357	2.395e-05				Actn1	3.00526	1.39e-11
Pirb	3.6229	2.87e-05				Csrp2	2.99456	1.6e-11
Ctsz	3.62275	1.494e-05				Tubb2b	2.98515	2.63e-11
Itgb2	3.62126	1.78e-05				Ftl1	2.98392	5.53e-11
Laptm5	3.61973	6.84e-06				Pdpn	2.97218	2.88e-11
Spi1	3.6064	6.84e-06				Efcab2	-2.95474	9.09e-11
Hp	3.60402	0.0001019				Coq10a	-2.95185	2.88e-11
Igsf6	3.59662	6.34e-06				Acss1	-2.9475	3e-11
Cxcl5	3.58231	3.328e-05				Ccl2	2.93402	1.22e-10
Clec4n	3.57693	0.00079339				Txlnb	-2.93172	8.52e-11
Pld4	3.57587	1.965e-05				Eci1	-2.92425	1.39e-11
Lcp1	3.5314	0.00029712				Capg	2.91246	2.23e-11
Ptpn6	3.52581	2.051e-05				Cthrc1	2.91022	1.24e-11
Nxpe5	3.51446	0.00025136				Angptl4	2.8843	6.33e-07
Hist1h3e	3.49416	0.00034379				Fcgr4	2.87333	6.11e-10
Cybb	3.49015	3.47e-05				Ppm1k	-2.86593	1.79e-10
Fcgr3	3.44853	3.041e-05				Slc2a4	-2.85481	1.66e-11
Lpcat2	3.44555	4.69e-06				Sh3bgrl3	2.83882	1.25e-10
Pik3ap1	3.43856	0.00016752				Lpxn	2.79915	3.37e-11
C1qb	3.43585	4.163e-05				Col5a1	2.79401	4.32e-11
Hist1h3h	3.43439	6.488e-05				Fbxo31	-2.79027	2.99e-11
Acp5	3.4245	0.00065664				Ift81	-2.78992	1.12e-10
Tgfbi	3.4212	9.123e-05				Fitm2	-2.78992	1.71e-11
Plek	3.41985	4.434e-05				Fhl2	-2.77443	2.66e-11
Mnda	3.41621	1.617e-05				Doc2g	-2.77345	2.19e-11
Aebp1	3.41608	4.95e-05				Eno3	-2.77314	8.86e-11
Rac2	3.40424	0.00018075				Inmt	-2.76577	7.66e-07
Slc11a1	3.39716	0.00060878				Pln	-2.76249	1.5e-10
Hpgds	3.38868	1.617e-05				Coro1a	2.75114	9.36e-11
Msr1	3.37927	0.00023215				S100a11	2.7498	9.71e-11
Gpr65	3.36102	0.00016216				Tmod4	-2.74788	2.11e-11
Pla2g7	3.35708	0.00075175				Fbp2	-2.74774	5.37e-10
Fcgr4	3.35221	3.181e-05				Ctss	2.73873	3.76e-10
Ms4a6c	3.35041	1.847e-05				Wisp1	2.73702	8.57e-11
C1qa	3.33586	7.49e-06				Tubb6	2.73532	3.02e-10
Hist1h3i	3.33537	0.00019549				Cfp	2.73443	3.74e-10
Lyz1	3.32321	1.48e-05				Uck2	2.73259	6.87e-10
Hist2h3b	3.31734	0.00067321				Tcea3	-2.73128	1.48e-10
Hist2h3c2	3.30863	0.00061881				Mylk3	-2.71232	1.42e-10
Hist2h3c1	3.30863	0.00061881				Aco2	-2.71046	5.08e-10
Unc93b1	3.29546	2.909e-05				Wisp2	2.70989	7.34e-10
Pf4	3.29379	0.00017889				Macrod1	-2.70356	4.45e-11
Rbp1	3.29198	4.982e-05				Acacb	-2.70141	1.66e-11
Akr1b8	3.28062	7.021e-05				Fsd2	-2.69663	8.57e-11
Igf1	3.26675	7.021e-05				Gpr22	-2.68818	1.81e-09
Col5a2	3.26172	4.89e-05				Ogdh	-2.68434	1.24e-10
Fyb	3.25422	1.768e-05				Cpt1b	-2.68263	9.71e-11
Ftl1	3.24812	3.681e-05				Cyth4	2.66929	3.07e-10
C1qc	3.24807	4.89e-05				Litaf	2.66101	1.94e-10
Ms4a6b	3.23356	7.55e-06				Pdk4	-2.65547	3.23e-10
Kif11	3.2272	0.00021208				Gbas	-2.65208	9.95e-11
Aldh1a2	3.22115	1.617e-05				Lgmn	2.64962	1.25e-11
Ccna2	3.20158	0.00013955				Laptm5	2.64958	2.61e-10
Tpx2	3.1983	9.845e-05				Nmrk2	2.64755	6.94e-09
Ccl8	3.19252	6.61e-06				Pxmp2	-2.64236	1.13e-10
AI607873	3.18976	6.164e-05				Col8a1	2.62775	1.95e-10
Ncf2	3.1779	3.216e-05				Anxa2	2.62442	7.4e-11
Csrp2	3.14979	8.951e-05				Rbfox1	-2.62071	8.94e-11
Clec7a	3.13465	0.00023577				Acadvl	-2.61883	3.52e-10
Tmem176a	3.13411	8.372e-05				Emb	2.61605	3.46e-11
Cilp	3.12801	0.00959791				Uhrf1	2.61137	2.54e-09
Tlr1	3.11629	0.00025706				ND4L	-2.60776	2.64e-09
Ccl9	3.11186	0.00022046				Crct1	2.60354	1.76e-10
Col5a1	3.11088	6.062e-05				Pf4	2.6005	2.79e-10
Nckap1l	3.1091	5.845e-05				Scgb1c1	-2.59683	1.79e-10
Cd37	3.10313	4.009e-05				Gstk1	-2.59572	7.7e-11
Cfp	3.10141	3.028e-05				Gusb	2.59486	1.54e-09
Loxl2	3.08806	4.216e-05				Fkbp11	2.59339	1.16e-10
Tmem106a	3.07522	1.297e-05				Srpx2	2.59338	1.74e-11
Cyth4	3.07165	0.00012007				Adgre1	2.58844	2.74e-10
Evi2a	3.07145	0.00012007				Vldlr	-2.5879	1.56e-11
Atp8b4	3.06499	3.429e-05				Sgca	-2.58398	6.04e-11
Fxyd5	3.05773	1.352e-05				Slc25a34	-2.57796	9.85e-09
Csf2rb2	3.05569	0.00031798				Ctgf	2.57082	1.41e-08
Nuf2	3.05428	0.00431074				Gdf15	2.56798	8.53e-11
Hist2h2bb	3.04374	0.00029286				Ppargc1a	-2.56478	9.68e-09
Bnc2	3.04067	7.128e-05				P2ry6	2.55613	1.92e-11
Kif2c	3.03124	0.00068346				C1qb	2.55016	1.29e-09
Serpinb1a	3.02516	0.0002605				Mcm5	2.54921	1.14e-10
Kif20a	3.02511	0.00011948				Adprhl1	-2.54584	6.1e-11
Ifi204	3.00966	3.106e-05				Idh2	-2.54534	5.23e-11
Fbn1	3.00669	0.00038992				Grn	2.5401	1.21e-10
CFTR	3.00531	0.0005927				Ckmt2	-2.53721	1.19e-10
Bub1b	2.99985	2.427e-05				Hist2h2ac	2.52893	1.23e-10
Gpr35	2.99514	0.00018585				Ttn	-2.52742	1.28e-09
Anpep	2.9945	6.888e-05				Ifi30	2.52624	6.41e-11
Rcn3	2.99424	1.052e-05				Bckdha	-2.52533	7.51e-10
Cxcl10	2.95337	0.0002513				Cdca3	2.52508	1.66e-10
Hist1h2ah	2.94479	0.00056626				Ephx2	-2.52449	2.48e-09
Ptafr	2.94181	0.00025136				Cpt2	-2.51917	4.18e-11
Tbxas1	2.93905	0.0002513				Serpina3g	2.5169	3.25e-11
Themis2	2.93624	4.216e-05				Evi2a	2.51625	3.64e-11
Pbk	2.93042	0.00083414				Acaa2	-2.51591	2.87e-09
Apoe	2.91807	5.01e-06				Cd84	2.51468	5.08e-10
Il33	2.90635	0.00133763				Adamts2	2.51438	1.02e-10
Selp	2.8869	0.00124026				Gpr176	2.51434	7.28e-11
Scd4	-2.87535	4.42e-05				Coq9	-2.51269	6.41e-11
Hist1h2ae	2.86732	0.00014577				Cmss1	-2.51057	2.26e-11
Cdca3	2.85358	0.00056218				Dbp	-2.50982	2.82e-06
Cxcl16	2.84285	3.328e-05				Pgam2	-2.50979	1.35e-10
B430306N03Rik	2.84153	0.00163254				Emp3	2.49939	4.18e-11
Arg1	2.84062	0.0052787				Lst1	2.49843	4.14e-10
Sprr2a2	2.84058	0.0244973				Ky	-2.49699	4.51e-11
Tnfaip8l2	2.83982	2.427e-05				Fxyd5	2.49449	2.13e-10
Lcp2	2.8392	0.00010113				Pygb	-2.48893	6.73e-10
Ccl2	2.81071	0.00078598				Myo1f	2.48788	1.81e-10
Hexb	2.80613	4.78e-05				Cpeb3	-2.48627	2.84e-10
Adamts2	2.80094	0.0002513				Enpp1	2.48183	1.6e-10
Bcat1	2.78523	0.00079722				Ivd	-2.47692	1.96e-09
Saa3	2.77634	0.00014577				Lsmem1	-2.47598	3.22e-10
Igsf10	2.77086	5.028e-05				Apbb1	-2.47532	2.56e-10
Myof	2.76961	1.063e-05				Rhobtb1	-2.47407	9.71e-09
Fam105a	2.76922	0.00018075				D10Jhu81e	-2.47291	2.23e-11
Olfml3	2.76791	0.00011573				Glipr1	2.46379	3.09e-10
Mmp19	2.76728	0.00024125				Aph1a	-2.4629	2.28e-10
Kif23	2.76717	0.00011948				Dnajc28	-2.45589	3.96e-11
Plac8	2.76512	0.00241382				Lrrc39	-2.45119	8.57e-11
Cdk1	2.76412	0.00018981				Sirpb1a	2.44852	1.13e-10
Dock2	2.7547	0.00011573				Ccr5	2.4432	8.27e-11
Ctsc	2.74498	1.965e-05				Apoe	2.43453	1.02e-10
Phf11b	2.74039	0.00053755				Sirpa	2.43234	7.62e-11
Sla	2.73261	0.00010992				Asb10	-2.43082	1e-10
H2-DMb1	2.73068	0.00016216				Vim	2.4303	2.87e-10
Ctgf	2.7304	0.00108312				Actb	2.43014	4.07e-09
Pyhin1	2.72947	1.912e-05				Cd53	2.42732	1.22e-10
Ccl3	2.72532	0.00045387				Etfdh	-2.42497	1.58e-10
Hgf	2.72232	4.746e-05				Soat1	2.4181	9.25e-11
Foxm1	2.72085	0.00048836				Lhfpl2	2.41733	5.59e-10
Cd48	2.71412	2.858e-05				Sfrp2	2.41377	9.71e-11
Slamf9	2.70909	0.00025136				Fcrls	2.41235	5.46e-09
Cd200r1	2.70793	3.596e-05				Tlr13	2.4115	4.88e-10
Anxa2	2.70366	2.149e-05				Hhatl	-2.41004	1.45e-09
Cd300lh	2.69398	2.87e-05				Tnni3	-2.40871	1.74e-10
Loxl1	2.68698	0.00013315				Igsf1	-2.40717	5.16e-11
Btk	2.68219	3.106e-05				Gmpr	-2.4015	1.71e-10
Adgre1	2.68092	2.315e-05				Msl2	-2.39995	5.61e-11
Lgmn	2.66633	6.208e-05				Cyp1b1	2.39792	7.84e-10
Vim	2.66463	2.87e-05				Atp1a2	-2.39592	9.69e-10
Iqgap2	2.65057	0.00039749				Lilrb4a	2.38963	9.71e-09
Ccr5	2.64487	7.198e-05				Serpinb1a	2.38677	1.13e-10
Hist1h2ad	2.62827	0.00014972				Kif23	2.38557	1.2e-09
Csf1r	2.62682	6.488e-05				Loxl1	2.38503	3.11e-10
Srpx2	2.62571	0.0001694				Lpin1	-2.37464	4.32e-11
Hist1h2ao	2.62094	0.00056218				Asb11	-2.37354	1.16e-09
Hist1h1a	2.61793	0.00065511				Tmsb10	2.36381	3.12e-10
Gla	2.60937	0.00038271				Rab8b	2.36176	6.58e-11
Ncapg2	2.60848	3.47e-05				Tpd52	2.35819	1.26e-10
Hck	2.60014	9.123e-05				Tubb5	2.35319	2.4e-10
Il4ra	2.59916	0.00153835				Sbk1	-2.35047	8.62e-11
Inpp5d	2.59749	0.00030987				Mgst3	-2.3504	9.71e-11
Nfam1	2.59648	4.247e-05				Synpo	2.34771	1.47e-10
Pdgfc	2.593	6.276e-05				Nckap1l	2.34662	6.72e-11
Mpp1	2.59007	0.00013741				Cisd1	-2.34276	1.14e-10
AB124611	2.58893	0.00015969				Ugt1a10	2.34178	4.06e-11
Hist1h3g	2.57963	0.00026817				Ch25h	2.34085	1.74e-10
Kdelr3	2.57752	0.00034379				Kdelr3	2.34057	1.01e-09
Emp3	2.57587	2.427e-05				Tspo	2.33976	2.55e-10
C5ar1	2.57507	0.00016752				Ptgds	-2.33773	2.34e-08
Sirpa	2.57395	0.00013964				Birc5	2.33648	8.27e-11
Praf2	2.56228	6.619e-05				Cyba	2.334	4.18e-11
Mis18bp1	2.55766	0.00025136				Klhl24	-2.33387	2.66e-11
Ptprc	2.55756	0.00029153				Ctsz	2.31835	9.36e-11
Tmem173	2.55381	0.00044509				Glipr2	2.31092	1.97e-10
Cd44	2.55238	0.00018762				Lcn2	2.3089	7.28e-11
Car13	2.55207	0.00013556				Cox7a1	-2.30889	6.89e-11
Clec4a2	2.54517	0.00080965				Hist1h4h	-2.30849	1.88e-10
Bmp1	2.54217	7.021e-05				Fstl1	2.30682	1.1e-09
Star	2.54091	0.00089008				Lmod3	-2.30558	1.38e-10
P2ry6	2.53834	0.00016216				Cdkn3	2.30288	1.13e-10
Gm11710	2.53039	3.106e-05				Apobec1	2.30259	5.06e-10
Ccr1	2.52482	0.00185084				Dab2	2.30098	3.02e-10
Clec4a1	2.52475	0.00014888				Scn4b	-2.29955	4.88e-10
Tmem45a	2.51458	6.393e-05				8430408G22Rik	-2.29777	7.45e-09
Cd300lf	2.51078	0.00057009				Aldh6a1	-2.29626	1.95e-10
Hist1h2af	2.50772	0.00071848				Fbn1	2.29461	6.17e-08
Gm2a	2.50045	9.534e-05				Dpp7	2.29446	8.57e-11
Lgals1	2.49935	6.688e-05				Nudt8	-2.29202	4.49e-11
Vkorc1	2.49495	4.89e-05				2310040G07Rik	-2.29179	3.93e-11
Lpxn	2.48719	0.00013641				Tmem38a	-2.29151	2.32e-10
Kif4	2.48707	0.00053755				Mov10l1	-2.2909	5.23e-11
Oasl2	2.48576	0.00025011				Dlat	-2.28913	2.66e-11
Hcls1	2.48013	0.00332161				Arpc1b	2.28883	1.01e-10
Vav1	2.48	0.0001165				Chpt1	-2.28852	2.61e-10
Fermt3	2.4781	0.00068346				Rrbp1	2.28123	1.14e-10
Vat1	2.47252	0.00027057				Usp2	-2.28115	4.66e-08
Pcolce	2.46426	0.0002154				Cdk1	2.27261	1.31e-10
Dpysl3	2.45651	0.00015969				Acadm	-2.27146	5.23e-11
Il10ra	2.45649	0.00011407				Kcnd2	-2.26585	1.28e-09
Racgap1	2.45557	0.00036921				Aup1	2.26265	1.74e-09
Nusap1	2.45439	0.00359034				Oxld1	-2.26191	1.74e-10
Gusb	2.44801	0.00014768				Myadml2	-2.26101	4.64e-10
Ciart	-2.4416	0.00231156				Rbm47	2.25626	8.57e-11
Il1rn	2.43578	8.544e-05				Aldh4a1	-2.25497	6.68e-10
Thbs2	2.43309	1.778e-05				Myh8	-2.25471	1.05e-09
AF251705	2.43283	0.00013822				Idh3a	-2.25416	4.84e-10
P2rx7	2.42794	0.00018535				G0s2	-2.25315	6.46e-09
Stxbp2	2.4201	0.00016179				Art3	-2.25079	8.49e-11
Bst2	2.41521	0.0008562				Mfap5	2.25041	1.28e-09
Anxa1	2.41369	3.47e-05				Aprt	2.24998	9.21e-11
Myo5a	2.41368	0.00045287				Ttll1	-2.24795	1.63e-10
Slc15a3	2.41098	0.00138124				Hp	2.24557	6.41e-11
Top2a	2.40912	0.00029712				Efemp2	2.24434	3.72e-11
Aspn	2.40445	0.00292499				Art5	-2.23896	2.86e-09
Kif15	2.40333	0.00213413				Pcp4l1	-2.23786	3.2e-10
Il6	2.40091	0.0017607				9330162L04Rik	-2.23613	1.17e-10
Ect2	2.39904	0.00066142				Slc15a3	2.22623	6.62e-09
Hist1h2an	2.39783	0.00028121				Rab7b	2.22052	3.42e-11
Melk	2.3965	0.00015057				Mlycd	-2.21749	4.88e-10
Lair1	2.38255	0.0006538				Iqgap1	2.2133	7.13e-09
Myot	-2.37728	0.00027989				Fcgr3	2.21255	9.25e-11
Rbm3	2.3759	0.00036921				Rtn2	-2.21195	1.85e-09
Pik3cg	2.37339	0.00093134				Clec4n	2.21135	2.31e-10
Tlr8	2.36853	0.00016179				Pik3ap1	2.21113	2.25e-10
Clca3a1	2.36693	0.00011948				Ptn	2.20839	1.32e-08
Ccl6	2.36391	0.00311869				Vav1	2.20059	5.49e-10
Lgals3bp	2.36182	0.00116347				Rbp1	2.19813	7.7e-11
Pnp	2.36164	0.00027775				Tyms	2.19563	1.67e-10
Arrb2	2.35271	0.0002513				Cox8b	-2.19395	6.31e-11
Scpep1	2.34442	2.663e-05				Crat	-2.18954	4.99e-09
Ncf4	2.34394	0.00037826				Uap1l1	2.187	7.84e-11
Kif20b	2.34243	0.00051183				Tecr	-2.18447	3.91e-09
Rcn1	2.34139	8.56e-06				Slc4a3	-2.18161	3.18e-10
Cotl1	2.3335	0.00065218				Rcan1	2.17616	1.11e-06
Slc7a7	2.32837	0.00107665				Idh3g	-2.17342	1.87e-10
Bicc1	2.32572	3.328e-05				Col18a1	2.17337	1.58e-10
Meox1	2.32284	0.00208464				Myzap	-2.17299	6.76e-11
Mfap5	2.3098	0.00380889				Sparc	2.17261	4.66e-08
Prim1	2.3093	0.00042039				Ndufs2	-2.16947	8.57e-11
Irf7	2.30488	0.00124039				Fgf1	-2.16735	1.65e-10
Lipa	2.30398	0.00016481				Arl11	2.16689	1.53e-09
Slc7a8	2.30194	0.00200898				Clec4a3	2.16515	7.39e-10
Hacd4	2.30107	0.00047994				Nrros	2.16319	2.33e-09
Arhgap30	2.3001	7.198e-05				Emp1	2.16254	1.87e-09
Capg	2.29928	0.00016216				Fyco1	-2.16241	2.39e-10
Pdpn	2.29888	6.762e-05				C1qc	2.15752	2.04e-10
Pydc4	2.29799	0.00037713				Gsn	-2.15372	3.72e-11
Lst1	2.29671	5.033e-05				Corin	-2.15134	6.75e-10
Mrc1	2.29508	3.681e-05				Lyz1	2.15022	5.08e-10
Cd300ld	2.29475	3.47e-05				Nme1	2.14916	1.55e-10
Clcn5	2.29085	0.00011835				Col16a1	2.14812	6.17e-10
C1qtnf6	2.29067	0.00056196				Ndufv3	-2.14645	3.23e-10
Cstb	2.29051	7.046e-05				Vwa8	-2.14328	5.54e-10
Osr1	2.28726	0.0008869				Ctsk	2.14311	2.16e-09
Tuba4a	-2.28507	0.00019034				Pank1	-2.14096	1.03e-10
Hist1h2ag	2.28407	0.00025136				Tesc	-2.14086	1.14e-10
Pqlc3	2.27896	8.544e-05				Pdhb	-2.13914	2.38e-10
Dab2	2.27763	0.00095968				Qk	-2.1374	5.26e-10
Entpd7	2.27507	0.00093324				44815	2.1355	1.43e-09
Dock8	2.27221	0.00026895				Ech1	-2.13124	2.79e-10
Vcan	2.2634	4.746e-05				Saa3	2.12699	5.84e-11
Prc1	2.25058	0.00272547				Ivns1abp	-2.12556	1.93e-10
Prg4	2.25048	0.03197				Etfb	-2.12542	2.38e-10
Ppp1r18	2.24948	5.722e-05				Gpx7	2.12518	1.5e-10
Lum	2.24848	0.00029681				Hist1h2ag	2.12467	7.62e-11
Timp4	-2.24779	0.00784989				Cdc20	2.12307	6.91e-09
S100a6	2.24471	0.00031078				S100a4	2.12244	9.78e-11
Cd209a	2.24345	0.0002605				Anln	2.12188	9.25e-11
Figf	2.23904	0.00014815				Echs1	-2.12158	6.1e-11
Panx1	2.23553	7.862e-05				Asb2	-2.12017	1.76e-10
Creb3l1	2.23236	0.00017604				Gba	2.11954	1.58e-10
Tkt	2.22714	0.00038552				Vegfb	-2.11915	7.82e-11
Lacc1	2.22658	0.00026232				Lgals1	2.11645	1.76e-10
Samsn1	2.2233	0.00016752				Spcs3	2.11071	1.58e-10
Mx1	2.21348	0.00036652				Ppp1r18	2.11004	4.07e-10
Fam114a1	2.20919	0.00025136				Fam195a	-2.10978	8.57e-11
Clic1	2.20409	3.49e-05				Msrb2	-2.1095	9.36e-11
Rab32	2.19524	4.025e-05				Pbk	2.1087	3.39e-09
Emp1	2.19489	0.00061881				Ano10	-2.1057	9.19e-10
sodium	2.19019	0.00015057				Ryr2	-2.10465	1.14e-10
Nr4a3	-2.18966	0.00029957				Ndufab1	-2.10422	9.68e-11
Prkcb	2.18255	8.089e-05				Asb14	-2.1018	3.52e-10
Rai14	2.18242	0.00025706				Ggnbp1	-2.1017	4.31e-11
Dlgap5	2.18186	0.00067816				Plin4	-2.10111	7.93e-10
Retnla	-2.18024	0.00037176				Mapt	-2.09857	8.49e-10
Sh3bp2	2.17601	0.00158072				Serp1	2.09809	2.6e-10
Cers6	2.17023	3.181e-05				Thbs2	2.09726	3.8e-10
Ptprj	2.16747	9.022e-05				Ptpn6	2.09598	3.35e-10
Stab1	2.16654	8.347e-05				Cd63	2.09211	3.5e-10
Ctsk	2.16633	0.00084623				Timp4	-2.09101	3.35e-10
Il1r1	2.166	2.587e-05				Slc47a1	-2.09049	7.7e-11
Myc	2.16476	0.00139447				Lmnb1	2.09031	8.6e-09
Lrrc52	-2.16429	0.0290702				Slc25a11	-2.08722	1.14e-10
Serp1	2.16368	3.328e-05				Grb14	-2.07921	8.57e-11
Prss23	2.16118	0.00027063				Arl6ip1	2.07783	1.33e-10
Rab8b	2.15842	4.439e-05				Il15	-2.07716	4.64e-10
Slfn8	2.15436	3.47e-05				Lynx1	-2.07691	9.87e-10
Hpse	2.15427	7.862e-05				Ccnb1	2.07659	1.67e-10
Pik3r5	2.14517	0.00104005				Mcm6	2.0755	1.97e-09
Gpx7	2.14238	0.00028675				Mcm4	2.07393	9.25e-11
Bub1	2.13956	0.00065382				Il33	2.06866	8.57e-11
Anln	2.12576	0.00035801				Rtn4	2.06762	3.39e-09
Dusp18	-2.12331	0.00034599				Uqcrc1	-2.06719	2.53e-10
Txndc5	2.12132	0.00019463				Lrrc2	-2.06684	5.94e-10
Atad2	2.11981	0.0007965				Agtr1a	-2.06637	2.45e-10
Ada	2.11885	0.00157627				Arpc5	2.06637	6.76e-11
Pdgfrl	2.11451	0.00215831				Entpd5	-2.06585	1.51e-09
Steap1	2.11316	0.00440005				Vegfa	-2.0619	2.19e-10
Myo1f	2.11291	0.00016216				Itgb1bp2	-2.06009	1.03e-10
Havcr2	2.11197	4.982e-05				Fbln2	2.05618	1.25e-08
Cd300lb	2.1109	0.00049955				Tcirg1	2.05174	1.54e-09
Frzb	2.10679	0.00017818				Sptb	-2.05009	4.43e-10
Mxra8	2.10565	0.00064431				Cdca8	2.04831	1.93e-10
Iqgap1	2.10078	3.264e-05				Pdp2	-2.04686	7.8e-11
Npc2	2.09924	0.00013256				Rab3a	-2.04384	6.1e-11
Cxcr4	2.09668	0.00082066				Ndrg2	-2.04306	9.25e-11
Ly9	2.09246	0.00020713				Tnfrsf12a	2.04292	4.85e-08
Mctp1	2.09152	0.00078165				Ncf4	2.04109	1.24e-10
Slfn2	2.09084	0.00044824				Dynll1	2.03886	8.01e-11
Vwa3a	-2.0868	0.00252611				Map1lc3a	-2.03567	3.12e-10
Col6a3	2.08449	2.051e-05				Prepl	-2.03566	7.32e-11
G6pdx	2.08314	0.00017894				Abcc9	-2.03425	1.58e-10
Tlr9	2.08076	1.965e-05				Cd44	2.03424	2.03e-09
Thbs3	2.08032	0.00017248				Serpinh1	2.03303	2.06e-09
Ccnb1	2.07625	0.00014815				Asph	-2.03232	4.23e-10
Slc29a3	2.07561	0.00035792				Ak1	-2.03225	1.39e-10
Ctsh	2.07388	7.006e-05				Ldb3	-2.03203	3.61e-10
B4galt5	2.07361	5.845e-05				Dsg2	-2.03184	1.8e-09
Ddah1	2.07015	0.00907428				Sord	-2.0318	2.79e-09
Tifa	2.06962	6.488e-05				Dhrs11	-2.03151	6.1e-11
Gpx1	2.06375	6.289e-05				Mrc1	2.02987	1.58e-10
Arhgap15	2.06362	0.00071282				Hadhb	-2.025	1.5e-10
Antxr1	2.06105	0.0014132				Fyb	2.0175	2.26e-10
Chil3	2.06075	0.00740854				Selplg	2.01485	3.35e-10
Tm6sf1	2.05705	5.24e-05				Fam129b	2.01287	1.36e-10
Hist1h4m	2.04465	0.00176991				Tmem25	-2.01209	1.03e-10
Alpk2	-2.04275	0.00092787				Skap2	2.01107	7.62e-11
Ckap2l	2.038	0.00027775				Plk1	2.01067	1.95e-10
S100a4	2.03601	0.00018189				Mdh1	-2.01032	7.7e-11
Slfn4	2.03449	0.00375721				Gpx1	2.00808	1.16e-10
Vcam1	2.03428	0.00030451				Mb	-2.00702	1.15e-09
P2rx4	2.0328	0.00052496				Aif1	2.00443	1.78e-08
Alox5ap	2.0314	0.00094328
Hist1h2ab	2.03117	0.00156855
Sh2d1b1	2.02063	0.00175348
Gria3	2.02061	0.00031798
Gatm	2.017	5.455e-05
Cd80	2.0168	0.00100453
Dpp7	2.01349	0.00229454
Sdc3	2.01208	0.00088582
Prelid1	2.01061	0.00015512
Rhog	2.00954	0.00028513
Aoah	2.0094	7.699e-05
Mad2l1	2.00889	0.00053104
Slc37a2	2.00868	0.00033867
Clec5a	2.00407	0.00215831
Cxcl13	2.00257	0.00027117
Prr11	2.00175	0.00509574
