# Supplementary figures and images for: Expression Pattern and Molecular Mechanism of Oxidative Stress-Related Genes in Myocardial Ischemia–Reperfusion Injury
Source: MDPI journal article supplement (doi:10.3390/jcdd10020079), 2023-02-13

Supplementary S4. Results of three algorithms EPC, Degree, and Betweenness predicting Hub Genes.

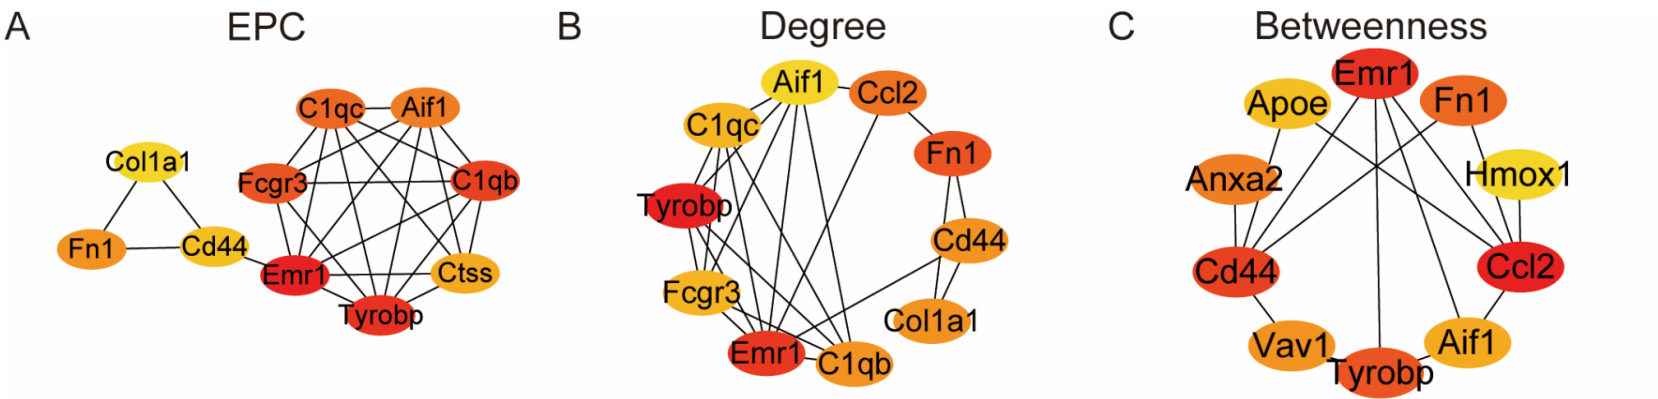

Supplement: s1 [file s1]
